# Supplementary material for: Randomized controlled trials of the effects of capsaicin or menthol on irritable bowel syndrome: a systematic review and meta-analysis
Source: Royal Society of Chemistry journal article supplement (doi:10.1039/d4fo04268a), 2024-01-01
Supplement: d4fo04268a1.pdf [file d4fo04268a1.pdf]

**Supplementary Table 1** Search strategies for the effects of capsaicin or menthol on abdominal pain in IBS (RCTs), which were performed through August 2024.

| Pubmed                                                                                                                                                                                                                                                                           | Web of Science                                                                                                                                                                                                                                                                         | Embase                                          | Cochrane Library                                                                                                                                                         |
|----------------------------------------------------------------------------------------------------------------------------------------------------------------------------------------------------------------------------------------------------------------------------------|----------------------------------------------------------------------------------------------------------------------------------------------------------------------------------------------------------------------------------------------------------------------------------------|-------------------------------------------------|--------------------------------------------------------------------------------------------------------------------------------------------------------------------------|
| 1. "Irritable Bowel Syndrome"[Mesh]                                                                                                                                                                                                                                              | 1. (((TS=(Irritable Bowel Syndrome)) OR TS=(Irritable Bowel Syndromes)) OR TS=(Irritable Colon)) OR TS=(Mucous Colitides)) OR TS=(Mucous Colitis)                                                                                                                                      | 1. irritable bowel syndrome'/exp                | 1. MeSH descriptor: [Irritable Bowel Syndrome] explode all trees                                                                                                         |
| 2. (((Irritable Bowel Syndrome[Title/Abstract]) OR (Irritable Bowel Syndromes[Title/Abstract])) OR (Irritable Colon[Title/Abstract])) OR (Irritable Colon[Title/Abstract]) OR (Mucous Colitis[Title/Abstract])                                                                   | 2. ((((((((((TS=(Capsaicin)) OR TS=(Capsaicine)) OR TS=(8-Methyl-N-Vanillyl-6-Nonenamide)) OR TS=(8 Methyl N Vanillyl 6 Nonenamide)) OR TS=(Antiphlogistine Rub A-535 Capsaicin)) OR TS=(Axsain)) OR TS=(Zostrix)) OR TS=(Capzasin)) OR TS=(NGX-4010)) OR TS=(NGX4010)) OR TS=(Capsin) | 2. 'irritable bowel syndrome':ti,ab             | 2. (Irritable Bowel Syndrome):ti,ab,kw OR (Irritable Bowel Syndromes):ti,ab,kw OR (Irritable Colon):ti,ab,kw OR (Mucous Colitides):ti,ab,kw OR (Mucous Colitis):ti,ab,kw |
| 3. ("Irritable Bowel Syndrome"[Mesh]) OR (((Irritable Bowel Syndrome[Title/Abstract]) OR (Irritable Bowel Syndromes[Title/Abstract])) OR (Irritable Colon[Title/Abstract])) OR (Irritable Colon[Title/Abstract]) OR (Mucous Colitis[Title/Abstract])                             | 3. TS=(random*)                                                                                                                                                                                                                                                                        | 3. 'irritable bowel syndromes':ti,ab            | 3. MeSH descriptor: [Capsaicin] explode all trees                                                                                                                        |
| 4. "Capsaicin"[Mesh]                                                                                                                                                                                                                                                             |                                                                                                                                                                                                                                                                                        | 4. 'irritable colon':ti,ab                      | 4. (Capsaicin):ti,ab,kw OR (Capsaicine):ti,ab,kw OR (Axsain):ti,ab,kw OR (Zostrix):ti,ab,kw OR (Capzasin):ti,ab,kw                                                       |
| 5. ((((((((((capsaicin[Title/Abstract]) OR (Capsaicine[Title/Abstract])) OR (8-Methyl-N-Vanillyl-6-Nonenamide[Title/Abstract])) OR (8 Methyl N Vanillyl 6 Nonenamide[Title/Abstract])) OR (Antiphlogistine Rub A-535 Capsaicin[Title/Abstract])) OR (Axsain[Title/Abstract])) OR |                                                                                                                                                                                                                                                                                        | 5. 'mucous colitides':ti,ab                     | 5. (Capsin):ti,ab,kw OR (8 Methyl N Vanillyl 6 Nonenamide):ti,ab,kw OR (NGX 4010):ti,ab,kw OR (NGX4010):ti,ab,kw                                                         |
|                                                                                                                                                                                                                                                                                  |                                                                                                                                                                                                                                                                                        | 6. 'mucous colitis':ti,ab                       | 6. (random*):ti,ab,kw                                                                                                                                                    |
|                                                                                                                                                                                                                                                                                  |                                                                                                                                                                                                                                                                                        | 7. #1 OR #2 OR #3 OR #4 OR #5 OR #6             | 7. #1 OR #2                                                                                                                                                              |
|                                                                                                                                                                                                                                                                                  |                                                                                                                                                                                                                                                                                        | 8. 'capsaicin'/exp                              | 8. #3 OR #4 OR #5                                                                                                                                                        |
|                                                                                                                                                                                                                                                                                  |                                                                                                                                                                                                                                                                                        | 9. 'capsaicin':ab,ti                            | 9. #6 AND #7 AND #8                                                                                                                                                      |
|                                                                                                                                                                                                                                                                                  |                                                                                                                                                                                                                                                                                        | 10. 'capsaicine':ab,ti                          | 10. MeSH descriptor: [Menthol] explode all trees                                                                                                                         |
|                                                                                                                                                                                                                                                                                  |                                                                                                                                                                                                                                                                                        | 11. '8-methyl-n-vanillyl-6-nonenamide':ab,ti    |                                                                                                                                                                          |
|                                                                                                                                                                                                                                                                                  |                                                                                                                                                                                                                                                                                        | 12. '8 methyl n vanillyl 6 nonenamide':ab,ti    |                                                                                                                                                                          |
|                                                                                                                                                                                                                                                                                  |                                                                                                                                                                                                                                                                                        | 13. 'axsain':ab,ti                              |                                                                                                                                                                          |
|                                                                                                                                                                                                                                                                                  |                                                                                                                                                                                                                                                                                        | 14. 'zostrix':ab,ti                             |                                                                                                                                                                          |
|                                                                                                                                                                                                                                                                                  |                                                                                                                                                                                                                                                                                        | 15. 'capzasin':ab,ti                            |                                                                                                                                                                          |
|                                                                                                                                                                                                                                                                                  |                                                                                                                                                                                                                                                                                        | 16. 'antiphlogistine rub a-535 capsaicin':ab,ti |                                                                                                                                                                          |

---

(Zostrix[Title/Abstract])) OR  
 (Capzasin[Title/Abstract])) OR (NGX-  
 4010[Title/Abstract])) OR (NGX  
 4010[Title/Abstract])) OR  
 (NGX4010[Title/Abstract])) OR (NGX-  
 4010[Title/Abstract])  
 6. ("Capsaicin"[Mesh]) OR  
 (((((((((((capsaicin[Title/Abstract]) OR  
 (Capsaicine[Title/Abstract])) OR (8-Methyl-  
 N-Vanillyl-6-Nonenamide[Title/Abstract]))  
 OR (8 Methyl N Vanillyl 6  
 Nonenamide[Title/Abstract])) OR  
 (Antiphlogistine Rub A-535  
 Capsaicin[Title/Abstract])) OR  
 (Axsain[Title/Abstract])) OR  
 (Zostrix[Title/Abstract])) OR  
 (Capzasin[Title/Abstract])) OR (NGX-  
 4010[Title/Abstract])) OR (NGX  
 4010[Title/Abstract])) OR  
 (NGX4010[Title/Abstract])) OR (NGX-  
 4010[Title/Abstract]))  
 7. ((randomized controlled trial[Publication  
 Type]) OR (randomized[Title/Abstract])) OR  
 (placebo[Title/Abstract])  
 8. (((("Irritable Bowel Syndrome"[Mesh])  
 OR (((Irritable Bowel

4. #1 AND #2 AND #3  
 5. ((TS=(Menthol)) OR TS=(5-  
 methyl-2-(1-methylethyl)))  
 OR  
 TS=((1alpha,2beta,5alpha)-  
 Isomer)  
 6. #1 AND #3 AND #5

17. 'ngx-4010':ab,ti  
 18. 'ngx 4010':ab,ti  
 19. 'ngx4010':ab,ti  
 20. 'capsin':ab,ti  
 21. #8 OR #9 OR #10 OR  
 #11 OR #12 OR #13  
 OR #14 OR #15 OR  
 #16 OR #17 OR #18  
 OR #19 OR #20  
 22. 'random':ab,ti  
 23. 'placebo':ab,ti  
 24. #22 OR #23  
 25. #7 AND #21 AND  
 #24  
 26. 'menthol'/exp  
 27. 'menthol':ab,ti  
 28. 'cyclohexanol':ab,ti  
 29. '5-methyl-2-(1-  
 methylethyl)':ab,ti  
 30. '(1alpha,2beta,5alpha)-  
 isomer':ab,ti  
 31. #26 OR #27 OR #28  
 OR #29 OR #30  
 32. #7 AND #24 AND  
 #31

11. (Cyclohexanol):ti,ab,kw OR  
 (5methyl2(1methylethyl)):ti,ab,kw OR  
 ((1alpha,2beta,5alpha)Isomer):ti,ab,kw  
 12. #10 OR #11  
 13. #6 AND #7 AND #12

---

---

Syndrome[Title/Abstract]) OR (Irritable  
Bowel Syndromes[Title/Abstract])) OR  
(Irritable Colon[Title/Abstract])) OR (Irritable  
Colon[Title/Abstract])) OR (Mucous  
Colitis[Title/Abstract])) AND  
(("Capsaicin"[Mesh] OR  
(((((((((((capsaicin[Title/Abstract]) OR  
(Capsaicine[Title/Abstract])) OR (8-Methyl-  
N-Vanillyl-6-Nonenamide[Title/Abstract]))  
OR (8 Methyl N Vanillyl 6  
Nonenamide[Title/Abstract])) OR  
(Antiphlogistine Rub A-535  
Capsaicin[Title/Abstract])) OR  
(Axsain[Title/Abstract])) OR  
(Zostrix[Title/Abstract])) OR  
(Capzasin[Title/Abstract])) OR (NGX-  
4010[Title/Abstract])) OR (NGX  
4010[Title/Abstract])) OR  
(NGX4010[Title/Abstract])) OR (NGX-  
4010[Title/Abstract])))) AND (((randomized  
controlled trial[Publication Type]) OR  
(randomized[Title/Abstract])) OR  
(placebo[Title/Abstract]))  
9. "Menthol"[Mesh]  
10. ((Cyclohexanol[Title/Abstract]) OR (5-  
methyl-2-(1-methylethyl[Title/Abstract]))))

---

---

OR ((1alpha,2beta,5alpha)-  
Isomer[Title/Abstract])

11. ("Menthol"[Mesh]) OR  
(((Cyclohexanol[Title/Abstract]) OR (5-  
methyl-2-(1-methylethyl[Title/Abstract])))

OR ((1alpha,2beta,5alpha)-  
Isomer[Title/Abstract]))

12. (("Irritable Bowel Syndrome"[Mesh])

OR (((((Irritable Bowel  
Syndrome[Title/Abstract]) OR (Irritable  
Bowel Syndromes[Title/Abstract])) OR  
(Irritable Colon[Title/Abstract])) OR (Irritable  
Colon[Title/Abstract])) OR (Mucous  
Colitis[Title/Abstract]))) AND

("Menthol"[Mesh]) OR  
(((Cyclohexanol[Title/Abstract]) OR (5-  
methyl-2-(1-methylethyl[Title/Abstract])))

OR ((1alpha,2beta,5alpha)-  
Isomer[Title/Abstract]))) AND

(((randomized controlled trial[Publication  
Type]) OR (randomized[Title/Abstract])) OR  
(placebo[Title/Abstract]))

---

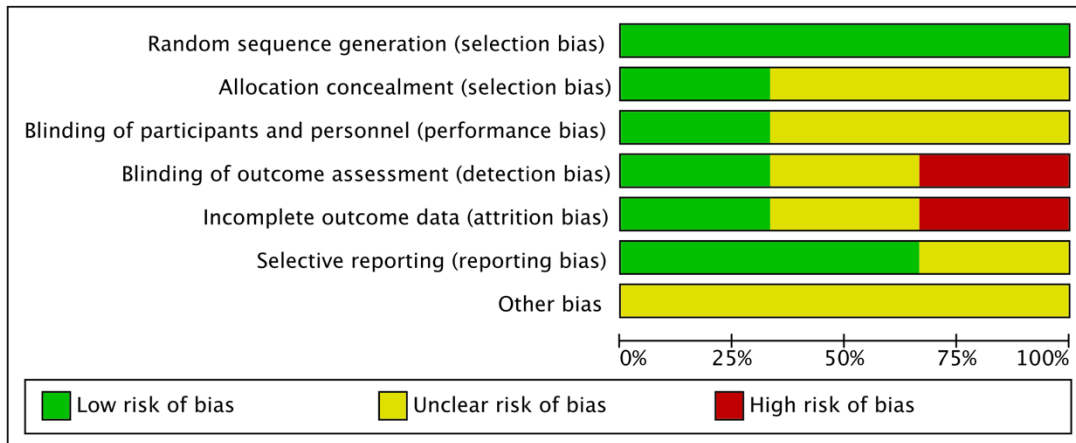

**Supplementary Figure 1** Risk-of-bias assessment for the capsaicin included studies. Trials with a low or high risk of bias in key domains were categorized as having a “low risk of bias” or “high risk of bias”, respectively. Otherwise, trials were categorized as having an “unclear risk of bias”.

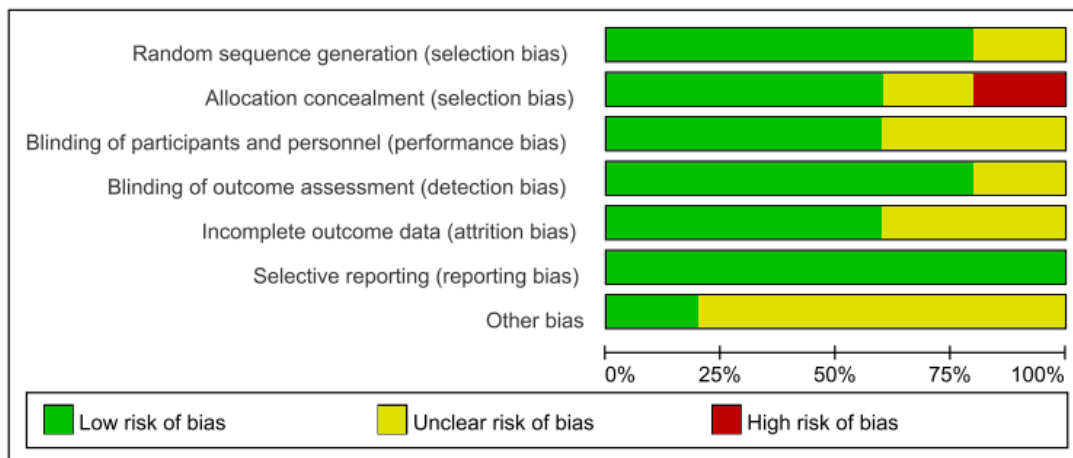

**Supplementary Figure 2** Risk-of-bias assessment for the menthol included studies. Trials with a low or high risk of bias in key domains were categorized as having a “low risk of bias” or “high risk of bias”, respectively. Otherwise, trials were categorized as having an “unclear risk of bias”.

**Author(s):**  
**Question:** Capsaicin compared to placebo for abdominal pain in irritable bowel syndrome  
**Setting:**  
**Bibliography:**

| Certainty assessment      |                   |              |               |              |             |                      | N <sub>e</sub> of patients |         | Effect            |                                                      | Certainty    | Importance |
|---------------------------|-------------------|--------------|---------------|--------------|-------------|----------------------|----------------------------|---------|-------------------|------------------------------------------------------|--------------|------------|
| N <sub>e</sub> of studies | Study design      | Risk of bias | Inconsistency | Indirectness | Imprecision | Other considerations | capsaicin                  | placebo | Relative (95% CI) | Absolute (95% CI)                                    |              |            |
| <b>VAS score</b>          |                   |              |               |              |             |                      |                            |         |                   |                                                      |              |            |
| 3                         | randomised trials | not serious  | not serious   | not serious  | not serious | none                 | 59                         | 63      | -                 | SMD <b>0.34 higher</b><br>(0.02 lower to 0.7 higher) | ⊕⊕⊕⊕<br>High |            |

CI: confidence interval; SMD: standardised mean difference

**Supplementary Figure 3** GRADE Assessment of researches about RCTs of the effects of capsaicin on abdominal pain in irritable bowel syndrome.

**Author(s):**  
**Question:** Menthol compared to placebo for abdominal pain in irritable bowel syndrome  
**Setting:**  
**Bibliography:**

| Certainty assessment      |                   |              |               |              |             |                      | N <sub>e</sub> of patients |         | Effect            |                                                    | Certainty    | Importance |
|---------------------------|-------------------|--------------|---------------|--------------|-------------|----------------------|----------------------------|---------|-------------------|----------------------------------------------------|--------------|------------|
| N <sub>e</sub> of studies | Study design      | Risk of bias | Inconsistency | Indirectness | Imprecision | Other considerations | menthol                    | placebo | Relative (95% CI) | Absolute (95% CI)                                  |              |            |
| <b>IBS symptom scores</b> |                   |              |               |              |             |                      |                            |         |                   |                                                    |              |            |
| 5                         | randomised trials | not serious  | not serious   | not serious  | not serious | none                 | 179                        | 184     | -                 | SMD <b>0.38 lower</b><br>(0.67 lower to 0.1 lower) | ⊕⊕⊕⊕<br>High |            |

CI: confidence interval; SMD: standardised mean difference

**Supplementary Figure 4** GRADE Assessment of researches about RCTs of the effects of menthol on abdominal pain in irritable bowel syndrome.

PRISMA 2020 flow diagram for new systematic reviews which included searches of databases and registers only

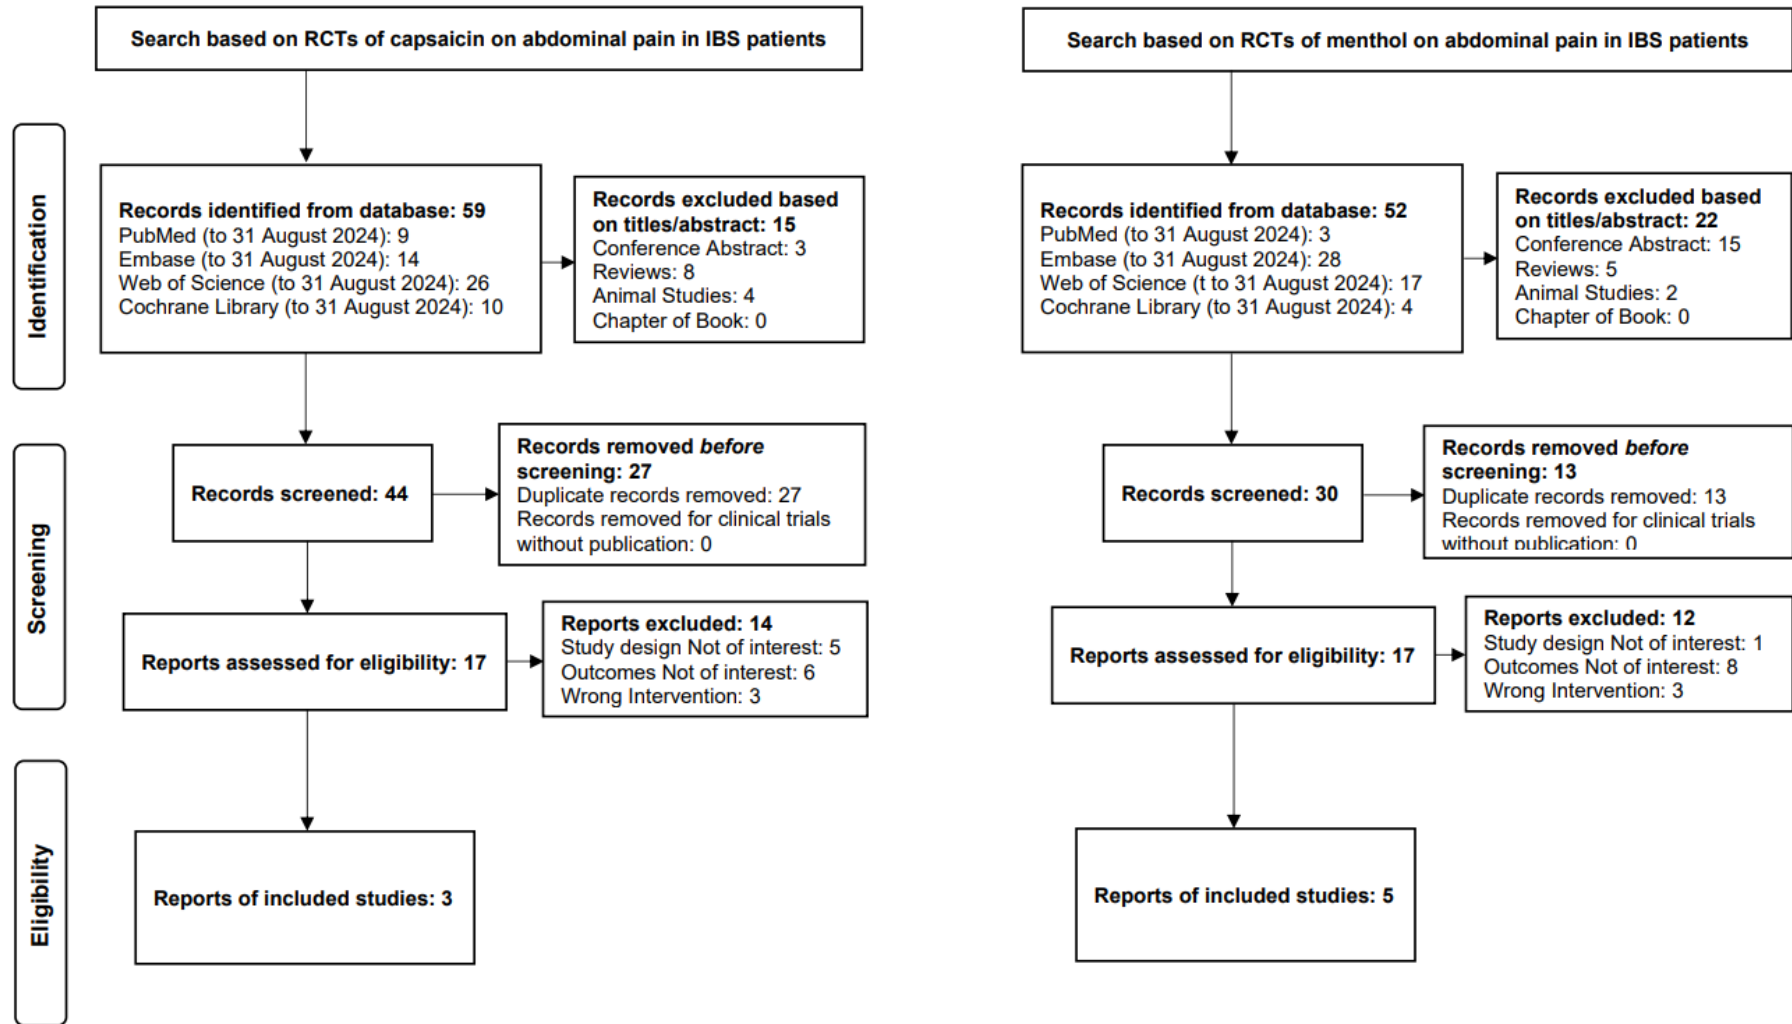

**PRISMA 2020 flow diagram for new systematic reviews which included searches of databases and registers only**

\*Consider, if feasible to do so, reporting the number of records identified from each database or register searched (rather than the total number across all databases/registers).

\*\*If automation tools were used, indicate how many records were excluded by a human and how many were excluded by automation tools.

*From:* Page MJ, McKenzie JE, Bossuyt PM, Boutron I, Hoffmann TC, Mulrow CD, et al. The PRISMA 2020 statement: an updated guideline for reporting systematic reviews. *BMJ* 2021;372:n71. doi: 10.1136/bmj.n71

For more information, visit: <http://www.prisma-statement.org/>
